# Supplementary material for: Genetic analyses reveal complex dynamics within a marine fish management area
Source: PubMed Central journal article supplement (PMC6439499; doi:10.1111/eva.12760), 2019-01-20
Supplement: EVA-12-830-s006.pdf [file EVA-12-830-s006.pdf]

Supporting information for: Genetic analyses reveal complex dynamics within a marine fish management area

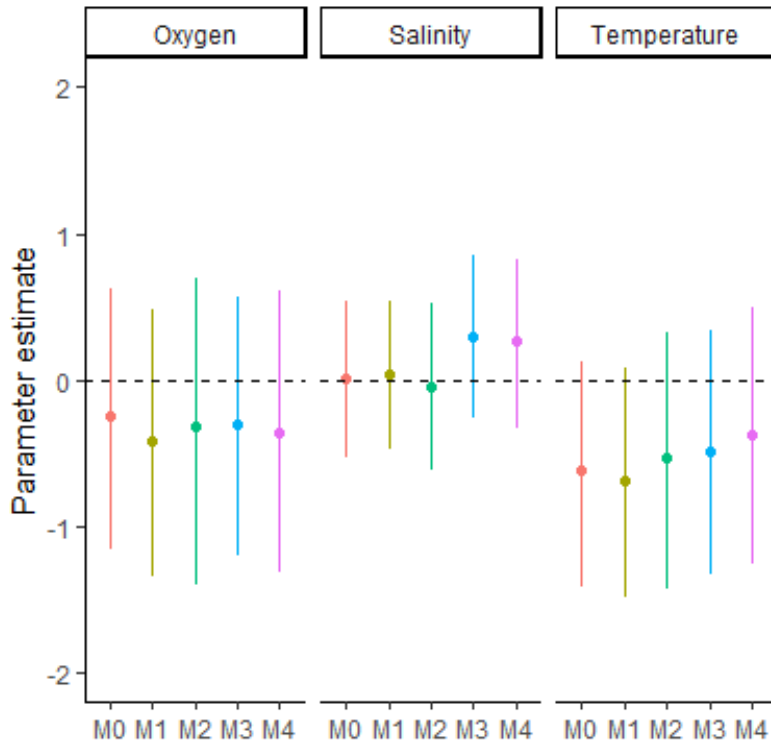

Figure S3. Posterior means and 95 % credible intervals of estimated fixed effects parameters oxygen, salinity and temperature for the five evaluated models.
